# Supplementary material for: 5-Carboxyfluorescein: intrinsic peroxidase-like catalytic activity and its application in the biomimetic synthesis of polyaniline nanoplatelets
Source: Royal Society of Chemistry journal article supplement (doi:10.1039/c7tb01064h), 2017-01-01
Supplement: c7tb01064h1.pdf [file c7tb01064h1.pdf]

## Electronic Supplementary Information

### 5-Carboxyfluorescein: Intrinsic peroxidase-like catalytic activity and its application to biomimetic synthesis of polyaniline nanoplatelets

Qiong Hu,<sup>†a</sup> Li Li,<sup>†b</sup> Gengzhi Sun,<sup>b</sup> Dali Li,<sup>a</sup> Jinming Kong,<sup>\*a</sup> Wei Huang<sup>bc</sup> and Xueji Zhang<sup>\*d</sup>

<sup>a</sup> School of Environmental and Biological Engineering, Nanjing University of Science and Technology, Nanjing 210094, China.

<sup>b</sup> Key Laboratory of Flexible Electronics (KLOFE) & Institute of Advanced Materials (IAM), Jiangsu National Synergetic Innovation Center for Advanced Materials (SICAM), Nanjing Tech University, 30 South Puzhu Road, Nanjing 211816, China.

<sup>c</sup> Key Laboratory for Organic Electronics and Information Displays & Institute of Advanced Materials (IAM), Jiangsu National Synergetic Innovation Center for Advanced Materials (SICAM), Nanjing University of Posts and Telecommunications (NUPT), 9 Wenyuan Road, Nanjing 210023, China.

<sup>d</sup> Chemistry Department, College of Arts and Sciences, University of South Florida, East Fowler Ave, Tampa, Florida 33620-4202, United States.

\*Corresponding authors. E-mail addresses: [j.kong@njust.edu.cn](mailto:j.kong@njust.edu.cn) (J. Kong); [xueji@usf.edu](mailto:xueji@usf.edu) (X. Zhang).

† Dual contributors

## Experimental

### Reagents and chemicals

5-Carboxyfluorescein (5-FAM) was purchased from TCI (Shanghai) Development Co., Ltd. (Shanghai, China). Thiourea (TU) and *N*-methyl-2-pyrrolidinone (NMP) were purchased from J&K Scientific Ltd. (Shanghai, China). Horseradish peroxidase (HRP, 250~330 U mg<sup>-1</sup>), superoxide dismutase (SOD, 3000 U mg<sup>-1</sup>), 5,5-dimethyl-1-pyrroline *N*-oxide (DMPO), 3,3',5,5'-tetramethylbenzidine (TMB), ascorbic acid (AA), and aniline (purity 99.5%) were purchased from Sigma-Aldrich (St. Louis, MO). Hydrogen peroxide (H<sub>2</sub>O<sub>2</sub>, 30%), *N,N*-dimethylformamide (DMF), and concentrated hydrochloric acid (HCl, 38%) were obtained from Sinopharm Chemical Reagent Co., Ltd. (Shanghai, China). Sodium azide (NaN<sub>3</sub>) was purchased from Xiya Reagent Co., Ltd (Chengdu, China). All other chemicals were of analytical grade and used as supplied. Ultrapure water ( $\geq 18.25$  M $\Omega$ ) purified by Millipore Milli-Q water purification system was used in all experiments.

### Apparatus

Absorption spectra and the absorbance at 654 nm ( $A_{654}$ ) were recorded on a Shimadzu UV-3600 spectrophotometer. Inductively coupled plasma mass spectrometry (ICP-MS) was collected using an iCAP Q spectrometer (Thermo Scientific, USA). Electron paramagnetic resonance (EPR) was recorded on a Bruker EMX 10/12 EPR spectrometer (center field, 3480 G; sweep width, 200 G; microwave frequency, 10.034 GHz; microwave power, 20.410 mW; modulation frequency, 100 KHz; modulation amplitude, 1.0 Gauss; time constant, 40.960 ms; sweep time, 83.886 s). Fourier transform infrared (FTIR) spectroscopy was performed with a Nicolet iS10 spectrometer (Thermo Scientific, USA) and the spectra were collected after 32 scans between 4000 and 600 cm<sup>-1</sup>. X-ray diffraction (XRD) patterns were acquired using Bruker AXS diffractometer (D8 advance, 40 kV, 40 mA) with Cu K $\alpha$  radiation ( $\lambda = 1.5418$  Å); the scan range ( $2\theta$ ) was 10–50°. Cyclic voltammetry (CV) was carried out in 1.0 M H<sub>2</sub>SO<sub>4</sub> (nitrogen saturated) at room temperature with a RST5200F electrochemical workstation (Suzhou Risetest Electronic Co. Ltd., China). A conventional three-electrode system was used with a glassy carbon electrode (GCE,  $\Phi = 3$  mm) covered with a film of the biomimetically synthesized PANI as the working electrode, platinum wire as the auxiliary electrode, and saturated calomel electrode (SCE) as the reference electrode, respectively. A scan rate of 100 mV s<sup>-1</sup> was applied and the potential of the GCE was swept between -0.2 and 0.8 V vs SCE. All potentials mentioned in this work were referred to SCE. Scanning electron microscopy (SEM) images were collected on a JEOL JSM-7800F field emission scanning electron microscope (FESEM). Transmission electron microscopy (TEM) images were obtained from FEI Tecnai G20 operated at 200 kV.

### Peroxidase-like catalytic activity of 5-FAM

The peroxidase-like catalytic activity of 5-FAM was explored using TMB as the chromogenic substrate in the presence of  $\text{H}_2\text{O}_2$ . Briefly, 10  $\mu\text{L}$  of 5-FAM (6.0 mM in DMF), 10  $\mu\text{L}$  of TMB (60 mM in DMF), and 10  $\mu\text{L}$  of 0.6 M  $\text{H}_2\text{O}_2$  were added into 570  $\mu\text{L}$  of 0.2 M HAC/NaAc buffer solution (pH 3.0); after an incubation of 30 min at 25  $^\circ\text{C}$ , the absorption spectrum of the resulting solution was recorded.

### Biomimetic synthesis of PANI

The biomimetic synthesis of PANI was carried out in 1.0 M HCl, containing 0.2 M NMP. In the reaction solution, the final concentrations of 5-FAM, aniline, and  $\text{H}_2\text{O}_2$  were 0.2 mM, 0.1 M, and 25 mM, respectively. The solution was incubated at 37  $^\circ\text{C}$  for 15 h, without any stirring or mechanical agitation, and then the resulting dark-green product was collected and purified by dialysis (dialysis tube, 12,000-14,000 MW cutoff) with ultrapure water, and dried under dynamic vacuum. For comparisons, the chemically synthesized PANI was obtained under similar conditions but in the absence of 5-FAM.

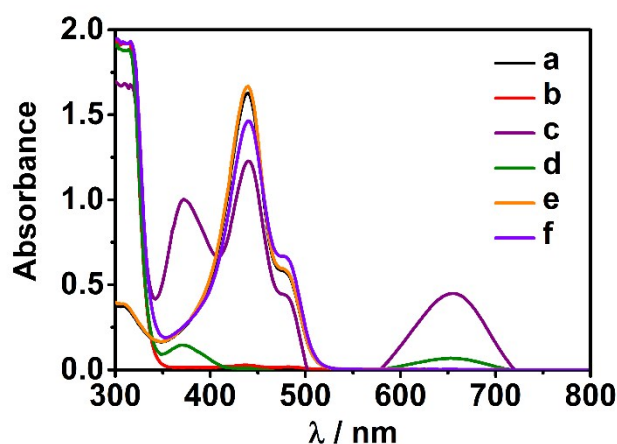

**Fig. S1** Absorption spectra in the presence of (a) 0.1 mM 5-FAM, (b) 1.0 mM TMB, (c) 0.1 mM 5-FAM + 1.0 mM TMB + 10 mM  $\text{H}_2\text{O}_2$ , (d) 1.0 mM TMB + 10 mM  $\text{H}_2\text{O}_2$ , (e) 0.1 mM 5-FAM + 10 mM  $\text{H}_2\text{O}_2$ , or (f) 0.1 mM 5-FAM + 1.0 mM TMB. Experiments were carried out in 0.2 M HAC/NaAc (pH 3.0). The incubation time was 30 min.

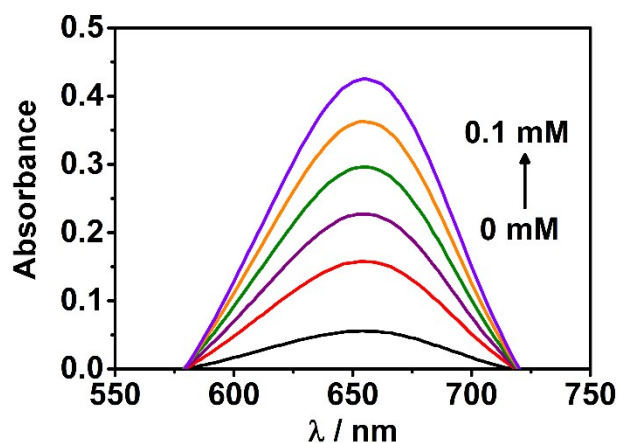

**Fig. S2** Absorption spectra of the resulting solutions in the presence different concentrations of 5-FAM. Experiments were carried out in 0.2 M HAC/NaAc (pH 3.0) in the presence of 1.0 mM TMB and 10 mM H<sub>2</sub>O<sub>2</sub>. The incubation time was 30 min.

**Table S1** IPC-MS analysis of residual metals in 5-FAM

| Element | Content            | Element | Content          | Element | Content | Element | Content |
|---------|--------------------|---------|------------------|---------|---------|---------|---------|
| Mg      | 0.016‰ (24.95 nM)  | Cr      | 0.003‰           | Cu      | <0.001‰ | Sb      | 0.001‰  |
| Ca      | 0.119‰ (112.09 nM) | Mn      | 0.009‰ (5.83 nM) | Zn      | <0.001‰ | Ba      | 0.003‰  |
| Al      | <0.001‰            | Fe      | 0.010‰ (6.59 nM) | Mo      | 0.010‰  | Tl      | <0.001‰ |
| Ti      | 0.003‰             | Co      | <0.001‰          | Ag      | 0.002‰  | Pb      | 0.003‰  |
| V       | 0.006‰             | Ni      | <0.001‰          | Cd      | 0.002‰  |         |         |

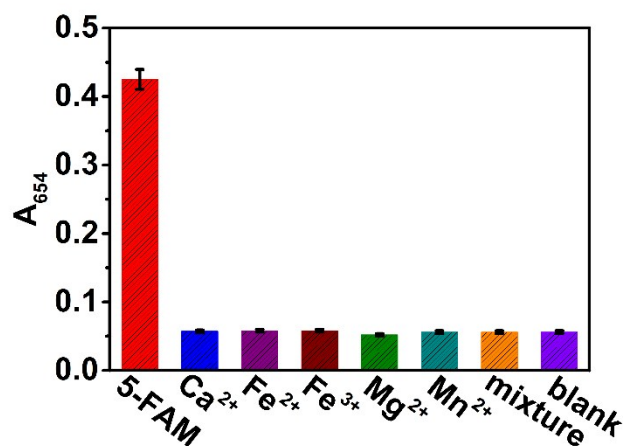

**Fig. S3**  $A_{654}$  in the presence of 5-FAM (6.0 mM, 10  $\mu$ L), Ca<sup>2+</sup> (120 nM, 10  $\mu$ L), Fe<sup>2+</sup> (7.0 nM, 10  $\mu$ L), Fe<sup>3+</sup> (7.0 nM, 10  $\mu$ L), Mg<sup>2+</sup> (30 nM, 10  $\mu$ L), Mn<sup>2+</sup> (6.0 nM, 10  $\mu$ L), their mixture, or the blank control (i.e., without the addition of 5-FAM or any kind of metal ions). Experiments were carried out in 0.2 M HAC/NaAc (pH 3.0) in the presence of 1.0 mM TMB and 10 mM H<sub>2</sub>O<sub>2</sub>. The incubation time was 30 min. Error bars represent the standard deviations of three repeated measurements.

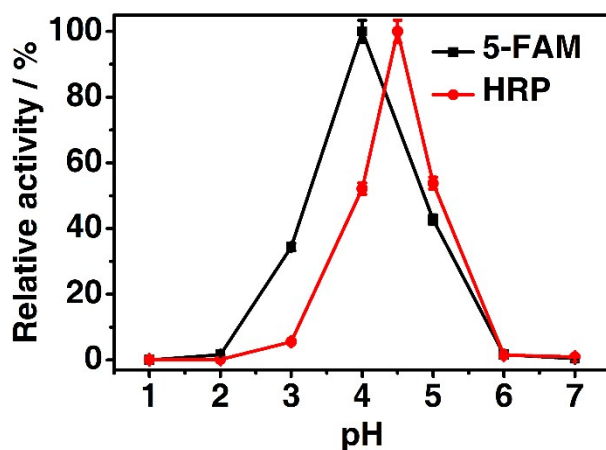

**Fig. S4** Effects of pH on the catalytic activity of 5-FAM and HRP. In a typical assay, 10  $\mu\text{L}$  of 6.0 mM 5-FAM (dissolved in DMF) or 10  $\mu\text{L}$  of 0.3  $\text{ng mL}^{-1}$  HRP, followed by 10  $\mu\text{L}$  of 60 mM TMB (dissolved in DMF) and 10  $\mu\text{L}$  of 0.6 M  $\text{H}_2\text{O}_2$  were added into 570  $\mu\text{L}$  of 0.2 M HAc/NaAc buffer solution with the pH ranging from 1.0 to 7.0; after an incubation of 30 min at 25  $^\circ\text{C}$ , the  $A_{654}$  was recorded. The maximum point in each curve is set as 100% and the relative activity for others is calculated accordingly. Error bars represent the standard deviations of three repeated measurements.

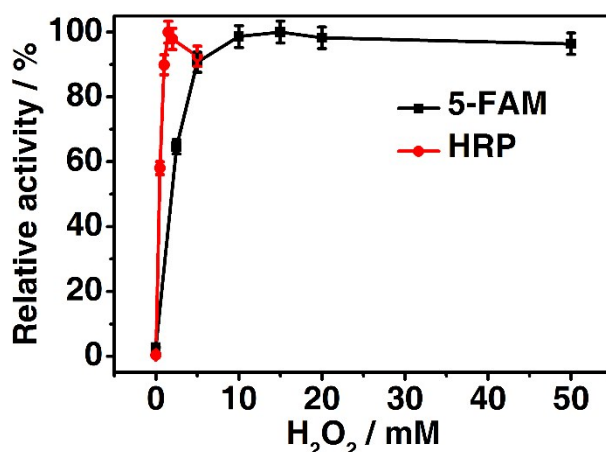

**Fig. S5** Effects of  $\text{H}_2\text{O}_2$  concentration on the catalytic activity of 5-FAM and HRP. For 5-FAM, 10  $\mu\text{L}$  of 6.0 mM 5-FAM (dissolved in DMF), 10  $\mu\text{L}$  of 60 mM TMB (dissolved in DMF), and 10  $\mu\text{L}$  of  $\text{H}_2\text{O}_2$  were added into 570  $\mu\text{L}$  of 0.2 M HAc/NaAc buffer solution (pH 4.0), with the final concentration of  $\text{H}_2\text{O}_2$  ranging from 0 to 50 mM; after an incubation of 30 min at 25  $^\circ\text{C}$ , the  $A_{654}$  was recorded. For HRP, 10  $\mu\text{L}$  of 0.3  $\text{ng mL}^{-1}$  HRP, 10  $\mu\text{L}$  of 60 mM TMB (dissolved in DMF), and 10  $\mu\text{L}$  of  $\text{H}_2\text{O}_2$  were added into 570  $\mu\text{L}$  of 0.2 M HAc/NaAc buffer solution (pH 4.5), with the final concentration of  $\text{H}_2\text{O}_2$  ranging from 0 to 5.0 mM; after an incubation of 30 min at 25  $^\circ\text{C}$ , the  $A_{654}$  was recorded. The maximum point in each curve is set as 100% and the relative activity for others is calculated accordingly. Error bars represent the standard deviations of three repeated measurements.

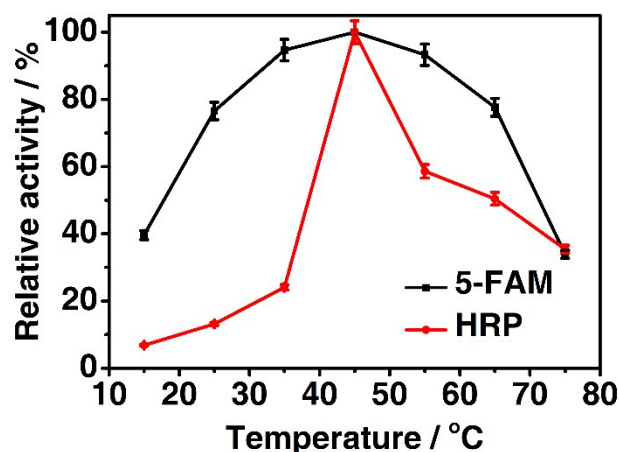

**Fig. S6** Effects of reaction temperature on the catalytic activity of 5-FAM and HRP. For 5-FAM, 10  $\mu\text{L}$  of 6.0 mM 5-FAM (dissolved in DMF), 10  $\mu\text{L}$  of 60 mM TMB (dissolved in DMF), and 15  $\mu\text{L}$  of 0.6 M  $\text{H}_2\text{O}_2$  were added into 565  $\mu\text{L}$  of 0.2 M HAC/NaAc buffer solution (pH 4.0); after an incubation of 30 min at different temperatures, the  $A_{654}$  was recorded. For HRP, 10  $\mu\text{L}$  of 0.3  $\text{ng mL}^{-1}$  HRP, 10  $\mu\text{L}$  of 60 mM TMB (dissolved in DMF), and 1.5  $\mu\text{L}$  of 0.6 M  $\text{H}_2\text{O}_2$  were added into 578.5  $\mu\text{L}$  of 0.2 M HAC/NaAc buffer solution (pH 4.5); after an incubation of 30 min at different temperatures, the  $A_{654}$  was recorded. The maximum point in each curve is set as 100% and the relative activity for others is calculated accordingly. Error bars represent the standard deviations of three repeated measurements.

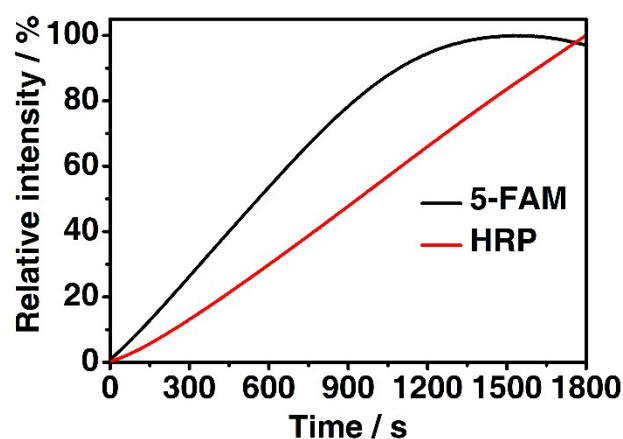

**Fig. S7** Kinetic curves at 654 nm. For 5-FAM, experiments were carried out at 45 °C in 0.2 M HAC/NaAc (pH 4.0) in the presence of 0.1 mM 5-FAM, 1.0 mM TMB and 15 mM  $\text{H}_2\text{O}_2$ ; for HRP, experiments were carried out at 45 °C in 0.2 M HAC/NaAc (pH 4.5) in the presence of 5.0  $\text{pg mL}^{-1}$  HRP, 1.0 mM TMB and 1.5 mM  $\text{H}_2\text{O}_2$ . The maximum point in each curve is set as 100% and the relative intensity for others is calculated accordingly.

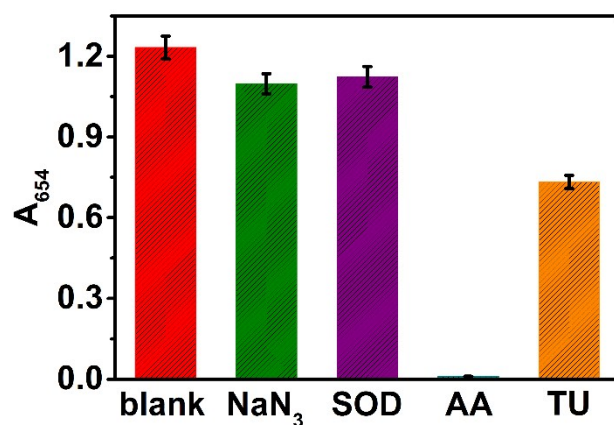

**Fig. S8**  $A_{654}$  in the presence of  $\text{NaN}_3$  (1.0 mM), SOD (30 U mL<sup>-1</sup>), AA (1.0 mM), TU (1.0 mM), or the blank control (i.e., without the addition of any scavenger). Experiments were carried out in 0.2 M HAC/NaAc (pH 4.0) in the presence of 0.1 mM 5-FAM, 1.0 mM TMB, and 15 mM H<sub>2</sub>O<sub>2</sub>. The incubation time was 30 min. Error bars represent the standard deviations of three repeated measurements.

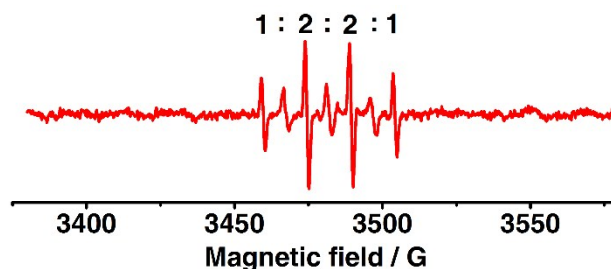

**Fig. S9** EPR spectrum with DMPO as the spin trap. It was acquired in 0.2 M HAC/NaAc (pH 4.0) in the presence of 50  $\mu\text{M}$  5-FAM, 15 mM H<sub>2</sub>O<sub>2</sub>, and 0.1 M DMPO (dissolved in 0.1 M PBS, pH 7.4). The appearance of other peaks, apart from the characteristic peaks of the typical DMPO-<sup>•</sup>OH adduct, is due to the partial oxidation of the DMPO spin trap during the transport and storage.

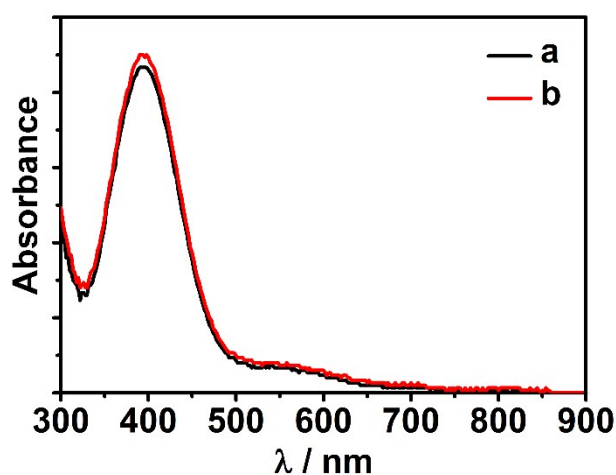

**Fig. S10** Absorption spectra of PANI synthesized in the presence (a) or absence (b) of 5-FAM. The solvent was NMP. The intense absorption band at 395 nm is due to the polaron transition.<sup>1</sup>

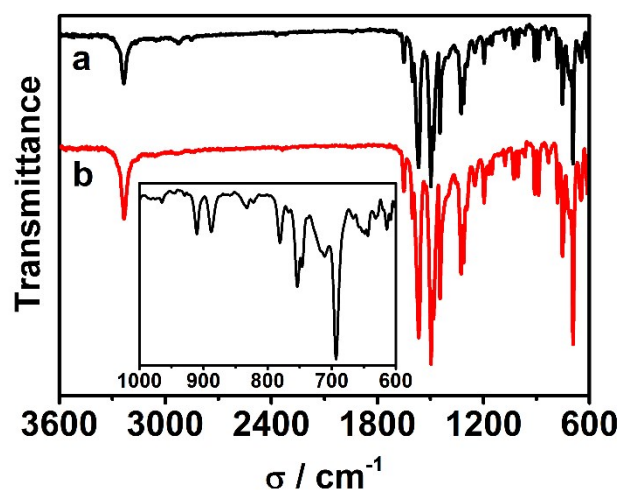

**Fig. S11** FTIR spectra of PANI synthesized in the presence (a) or absence (b) of 5-FAM. The characteristic bands at 3234 and 1650  $\text{cm}^{-1}$  arise from the anti-symmetric stretching vibration and the in-plane bending vibration of N-H bonds, respectively.<sup>2</sup> The bands at 1602 and 1567  $\text{cm}^{-1}$  are due to the stretching of quinoid ring.<sup>3</sup> The bands at 1497, 1484, and 1446  $\text{cm}^{-1}$  derive from the stretching of benzenoid ring.<sup>3,4</sup> Those at 1326, 1312, and 1295  $\text{cm}^{-1}$  are originated from the stretching of the C-N bonds of the secondary aromatic amines.<sup>3a,5</sup> The characteristic bands at 1249, 1196, 1077, 1027, and 1004  $\text{cm}^{-1}$  arise from the C-H in-plane bending vibrations, while those at 910, 888, 833, 781, 754, 746, and 693  $\text{cm}^{-1}$  from the C-H out-of-plane bending vibrations.<sup>6</sup>

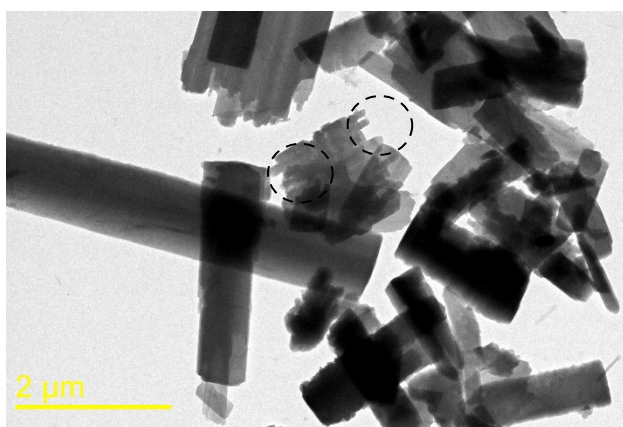

**Fig. S12** TEM image of the biomimetically synthesized PANI nanoplatelets.



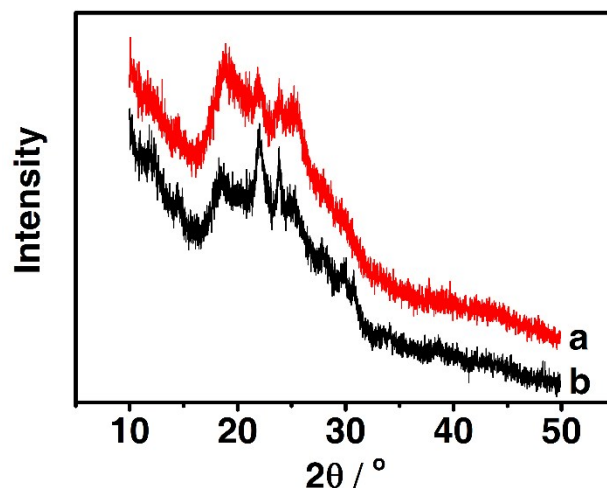

**Fig. S13** XRD patterns of PANI synthesized in the presence (a) or absence (b) of 5-FAM. The diffraction peaks at  $2\theta \sim 19^\circ$  and  $25^\circ$  correspond to the amorphous peak and the crystalline peak, respectively.<sup>7</sup>

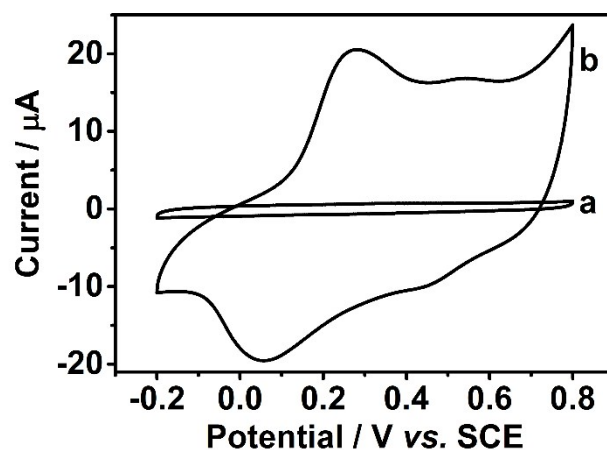

**Fig. S14** Cyclic voltammograms of (a) the bare GCE or (b) in the presence of a PANI film.

## Notes and references

- 1 W. Liu, J. Kumar, S. Tripathy, K. J. Senecal and L. Samuelson, *J. Am. Chem. Soc.*, 1999, **121**, 71.
- 2 N. R. Curvetto, D. Figlas, A. Brandolin, S. B. Saidman, E. H. Rueda and M. L. Ferreira, *Biochem. Eng. J.*, 2006, **29**, 191.
- 3 (a) J. Tang, X. Jing, B. Wang and F. Wang, *Synth. Met.*, 1988, **24**, 231; (b) Z. Zhang, Z. Wei and M. Wan, *Macromolecules*, 2002, **35**, 5937.
- 4 Y. Ma, S. R. Ali, L. Wang, P. L. Chiu, R. Mendelsohn and H. He, *J. Am. Chem. Soc.*, 2006, **128**, 12064.
- 5 T. Ohsaka, Y. Ohnuki and N. Oyama, *J. Electroanal. Chem.*, 1984, **161**, 399.
- 6 (a) M. Aizawa, L. Wang, H. Shinohara and Y. Ikariyama, *J. Biotechnol.*, 1990, **14**, 301; (b) E. T. Kang, K. G. Neoh and K. L. Tan, *Prog. Polym. Sci.*, 1998, **23**, 277.
- 7 (a) H. K. Chaudhari and D. S. Kelkar, *J. Appl. Polym. Sci.*, 1996, **62**, 15; (b) J. P. Pouget, M. E. Jozefowicz, A. E. A. Epstein, X. Tang and A. G. MacDiarmid, *Macromolecules*, 1991, **24**, 779.
